# Supplementary material for: Metal–CdSe Double Shell Hollow Nanocubes via Sequential Nanoscale Reactions and Their Photocatalytic Hydrogen Evolution
Source: Springer Nature journal article supplement (doi:10.1007/s11244-018-0951-0), 2018-05-11
Supplement: MOESM1 [file 15758376]

**Electronic Supplementary Material**

**Metal-CdSe Double Shell Hollow Nanocubes via Sequential Nanoscale Reactions and Their Photocatalytic Hydrogen Evolution**

**Woong Choi1 • Garam Park1 • Kyung-Lyul Bae1 • Ji Yong Choi1 • Won Seok Seo2 • Ki Min Nam3 • Hyunjoon Song1**

1 Department of Chemistry, Korea Advanced Institute of Science and Technology (KAIST), Daejeon 34141, Republic of Korea

2 Department of Chemistry, Sogang University, Seoul 04107, Republic of Korea

3 Department of Chemistry, Mokpo National University, Jeonnam 58554, Republic of Korea

**Chemicals.** Silver trifluoroacetate (CF3COOAg, 99.99+%, Aldrich), sodium hydrosulfide hydrate (NaSH∙xH2O, Aldrich), hydrochloric acid (HCl, 35.0%, Junsei), Poly (vinylpyrrolidone) (PVP, Mw = 55000, Aldrich), ethylene glycol (EG, 99%, J. T. Baker), hexachloroplatinic(IV) acid hydrate (H2PtCl6∙xH2O, 99.9+%, Aldrich), tetrachloroaurate(III) trihydrate (HAuCl4∙3H2O, 99.9+%, Aldrich), palladium(II) nitrate (Pd(NO3)2, 99.9+%, Aldrich), sodium chloride (NaCl, 99.999%, Aldrich), oleylamine (70%, Aldrich), oleic acid (99+%, Aldrich), sulfur (S, Aldrich), selenourea ((NH2)2CSe, 98%, Aldrich), cadmium nitrate tetrahydrate (Cd(NO3)2∙4H2O, 98%, Aldrich), and tributylphosphine (TBP, 97%, Aldrich) were used as received.

**Characterization.** Scanning electron microscopy (SEM) images and energy dispersive X-ray diffraction (EDX) spectra were obtained using a Nova 230 operated at 10 kV at KAIST and KBSI. Transmission electron microscopy (TEM) and high resolution TEM (HRTEM) images were acquired on Philips using JEOL JEM-ARM200 operated at 300 kV at NNFC. The X-ray diffraction (XRD) patterns were recorded on a Rigaku D/MAX-2500 (18 kW) diffractometer using Cu K radiation. The samples were prepared by the deposition of nanoparticle dispersions on small pieces (5 mm by 5 mm) of silicon wafer (P-100) for SEM, on slide glasses for XRD, or on copper grids coated with a lacey carbon film (Ted Pella, Inc) for TEM measurements, and evaporating the solvent in air.


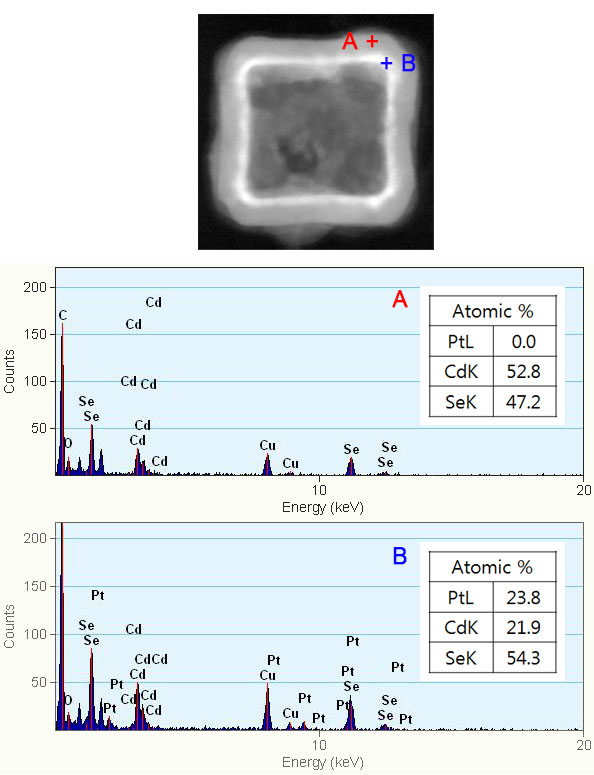


**Fig. S1** Point EDX analysis of a single Pt-CdSe double shell hollow nanocube.


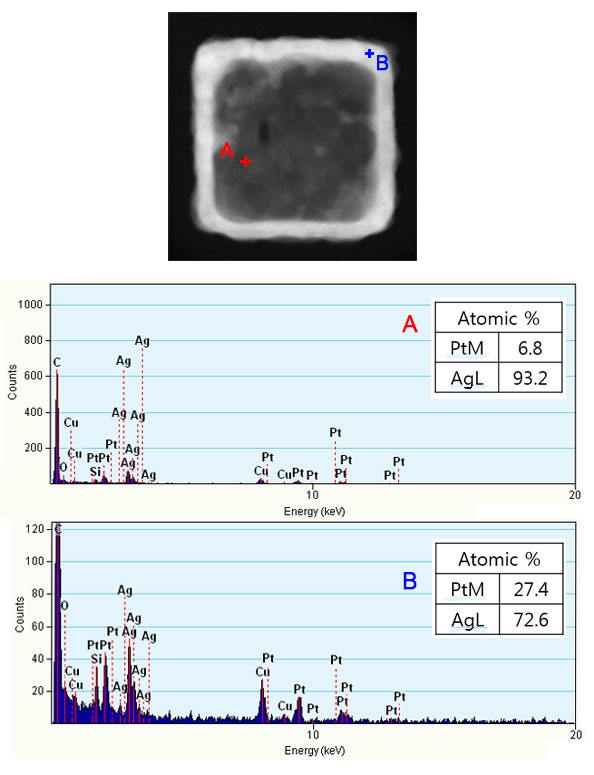


**Fig. S2** Point EDX analysis of a single PtAg hollow nanocube.


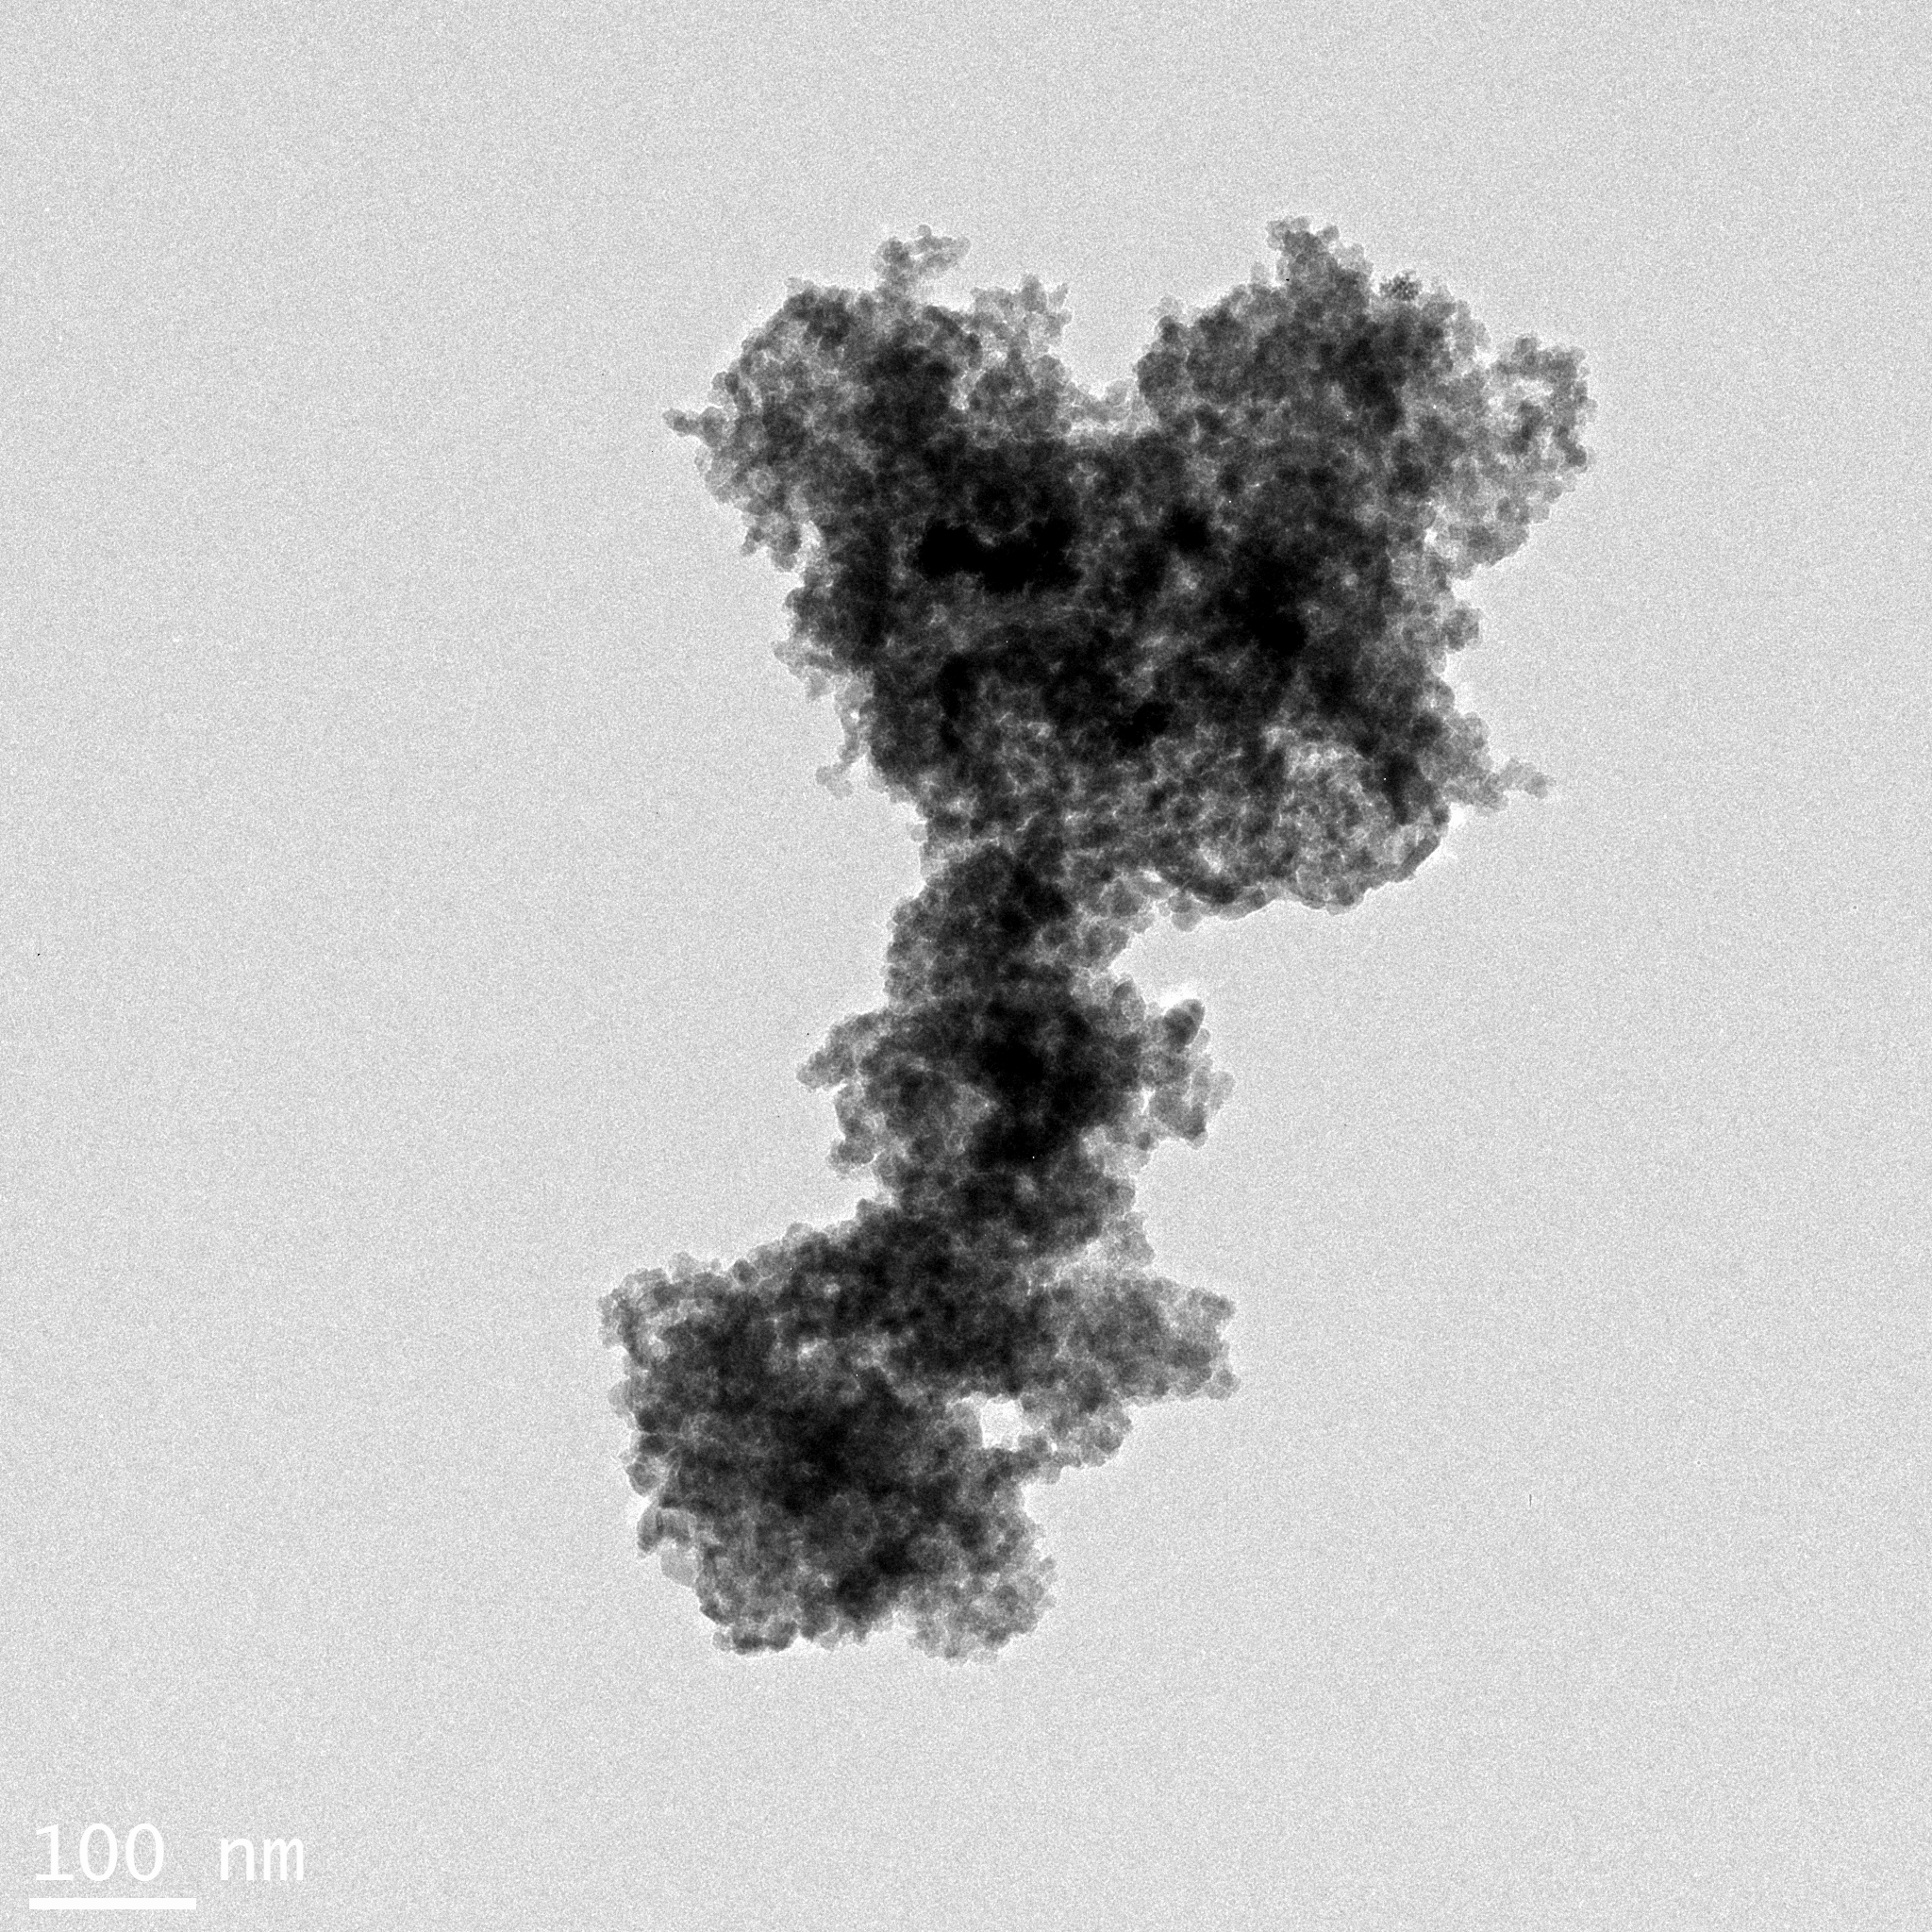


**Fig. S3** TEM image of CdSe spheres with photodeposited Pt cocatalysts.


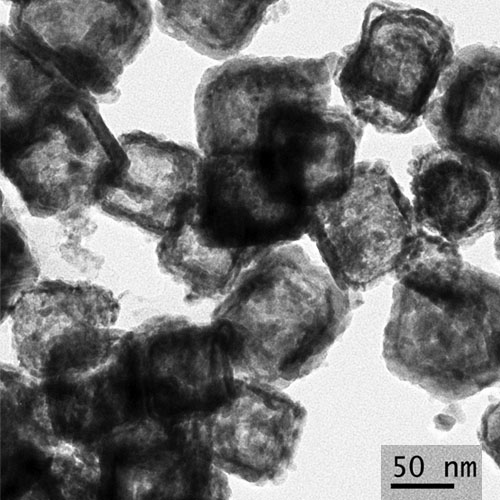


**Fig. S4** TEM image of Pt-CdSe double shell hollow nanocubes after the photocatalytic H2 evolution reaction over 10 h.


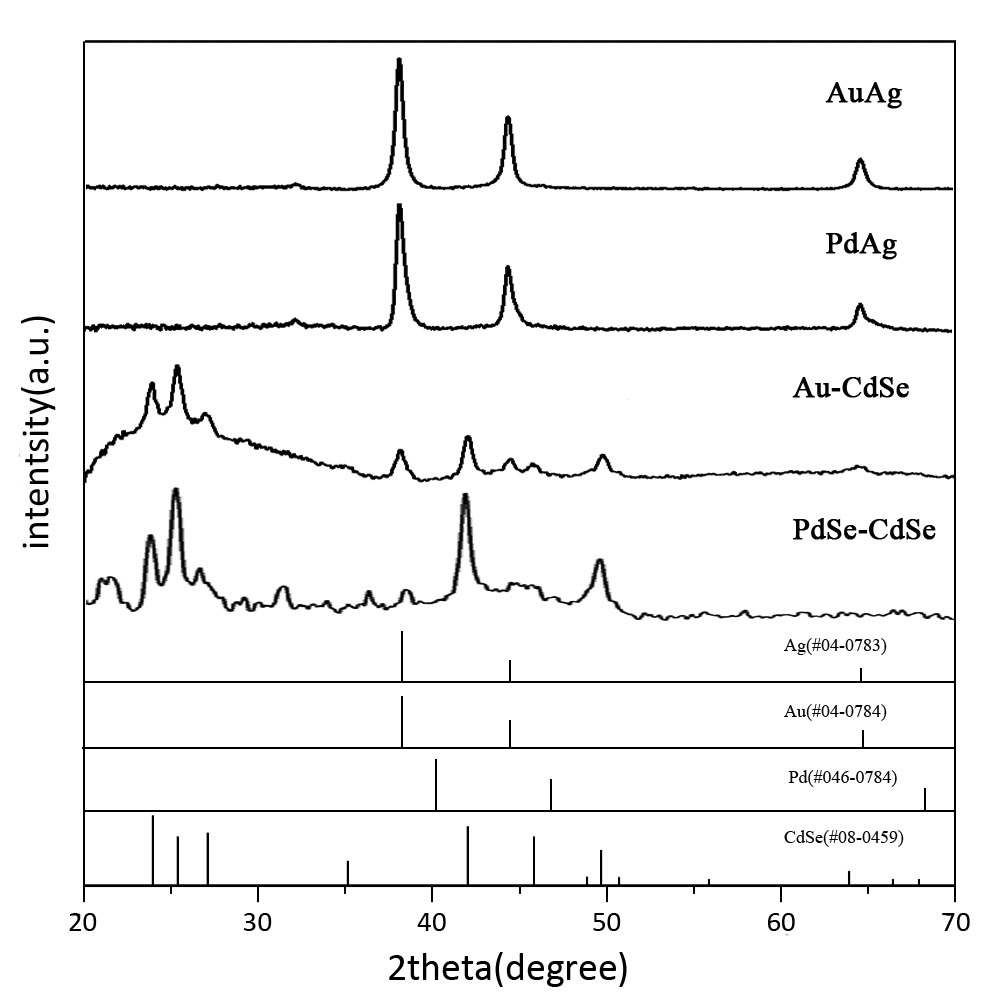


**Fig. S5** XRD spectra of AuAg and PdAg hollow nanocubes and Au-CdSe and PdSe-CdSe double shell hollow nanocubes.
